# Supplementary material for: Discovery of serum metabolites for diagnosis of progression of mild cognitive impairment to Alzheimer's disease using an optimized metabolomics method
Source: Royal Society of Chemistry journal article supplement (doi:10.1039/c5ra19349d), 2016-01-01
Supplement: c5ra19349d1.pdf [file c5ra19349d1.pdf]

**Table S1. Clinical Characteristics of the Patients**

| <b>Characteristics</b> | <b>MCI (n = 583)</b> | <b>AD (n = 660)</b> | <b>P value</b> |
|------------------------|----------------------|---------------------|----------------|
| Age, years             | 78.9±4.9             | 78.6±5.7            | 0.1176         |
| Sex (male/female)      | 289/294              | 328/332             | 0.5349         |
| BMI, kg/m <sup>2</sup> | 23.34±2.40           | 23.76±2.81          | 0.6637         |
| DBP, mmHg              | 74.33±13.72          | 75.74±11.27         | 0.1319         |
| SBP, mmHg              | 150.94±23.55         | 152.00±22.72        | 0.0675         |
| MMSE                   | 30.8±4.6             | 15.7±2.8            | 0.0002         |
| CAMCOG                 | 86.8±12.7            | 60.4±17.2           | 0.0008         |
| CSF A-AP, pg/mL        | 62.0±7.2             | 87.5±8.9            | 0.0007         |

Note: A-AP, A-amyloid protein; BMI, body mass index; DBP, diastolic blood pressure; SBP, systolic blood pressure; MMSE, Mini-Mental State Examination score; CAMCOG, Cambridge cognitive test. All data are presented as mean ± standard deviation. Parameter values were compared using t-test. The p values less than 0.05 were considered significant.
